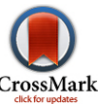

# Repeated Sense of Hunger Leads to the Development of Visceral Obesity and Metabolic Syndrome in a Mouse Model

Jong-Min Han, Hyeong-Geug Kim, Jin-Seok Lee, Min-Kyung Choi, Young-Ae Kim, Chang-Gue Son\*

Liver and Immunology Research Center, Institute of Traditional Medicine and Bioscience of Daejeon University, 22-5, Daeheung-dong, Jung-gu, Daejeon, Republic of Korea

## Abstract

Obesity-related disorders, especially metabolic syndrome, contribute to 2.8 million deaths each year worldwide, with significantly increasing morbidity. Eating at regular times and proper food quantity are crucial for maintaining a healthy status. However, many people in developed countries do not follow a regular eating schedule due to a busy lifestyle. Herein, we show that a repeated sense of hunger leads to a high risk of developing visceral obesity and metabolic syndrome in a mouse model (both 3-week and 6-week-old age, 10 mice in each group). The *ad libitum* (AL) group (normal eating pattern) and the food restriction (FR) group (alternate-day partially food restriction by given only 1/3 of average amount) were compared after 8-week experimental period. The total food consumption in the FR group was lower than in the AL group, however, the FR group showed a metabolic syndrome-like condition with significant fat accumulation in adipose tissues. Consequently, the repeated sense of hunger induced the typical characteristics of metabolic syndrome in an animal model; a distinct visceral obesity, hyperlipidemia, hyperglycemia and hepatic steatosis. Furthermore, we found that specifically leptin, a major metabolic hormone, played a major role in the development of these pathological disorders. Our study indicated the importance of regular eating habits besides controlling calorie intake.

**Citation:** Han J-M, Kim H-G, Lee J-S, Choi M-K, Kim Y-A, et al. (2014) Repeated Sense of Hunger Leads to the Development of Visceral Obesity and Metabolic Syndrome in a Mouse Model. PLoS ONE 9(5): e98276. doi:10.1371/journal.pone.0098276

**Editor:** Julie A. Chowen, Hospital Infantil Universitario Niño Jesús, CIBEROBN, Spain

**Received:** February 12, 2014; **Accepted:** April 30, 2014; **Published:** May 30, 2014

**Copyright:** © 2014 Han et al. This is an open-access article distributed under the terms of the Creative Commons Attribution License, which permits unrestricted use, distribution, and reproduction in any medium, provided the original author and source are credited.

**Funding:** This research was supported by the Basic Science Research Program through the National Research Foundation of Korea (NRF) founded by the Ministry of Education, Science and Technology (2012R1A1A2001519), the Oriental Medicine Research and Development Project, Ministry of Health and Welfare (B120047), and the "Study of aging-control by energy metabolism based on oriental medicine" of Korea Institute of Oriental Medicine, Republic of Korea (K12101). The funders had no role in study design, data collection and analysis, decision to publish, or preparation of the manuscript.

**Competing Interests:** The authors have declared that no competing interests exist.

\* E-mail: ckson@djju.ac.kr

## Introduction

Obesity-related disorders have become a global health problems and it was estimated 2.8 million deaths each year, with significant increasing morbidity [1]. Among these disorders, metabolic syndrome is common and includes conditions such as visceral obesity, dyslipidemia, insulin resistance and hepatic steatosis, which can result in diabetes mellitus, cardiovascular disease and stroke [2]. Consequently, there is an increasing need for studies exploring obesity control and prevention of metabolic syndrome.

Obesity occurs due to the imbalance of calorie intake and expenditure in the body. For many people, this imbalance results from excessive eating and lack of exercise. The human body is highly flexible regarding food intake and energy output within a wide calorie range. In particular, the ability to store extra calories as fat in different parts of the body has developed during starvation or lack of food intake for an extended length of time [3]. The brain regulates energy homeostasis in response to signals from both adipose tissue and the gastrointestinal tract via adjusting food intake and energy expenditure, which results in maintaining the stable body weight [4]. The several hunger hormones such as leptin, resistin and ghrelin are known to mediate these processes [5].

Frequently, people in modern society attempt to reduce their body weight using a calorie-controlled diet and intermittent fasting over a short period [6,7]. Many clinical studies have demonstrated that uncontrolled eating habits, such as diminishing the frequency of eating, repeated fasting and recurrent overeating, were linked with obesity-related disorders [8–11]. For example, during the month of Ramadan, practicing Muslims abstain from eating, drinking and smoking from dawn to sunset, followed by compensatory overeating; many observers of Ramadan experience weight gain and high levels of plasma lipids [12,13]. This pattern may be similar to the habits of people in a modern society who do not follow a regular eating schedule. Therefore, we hypothesized that a repeated sense of hunger contributed to the development of visceral obesity and metabolic syndrome.

Herein, we evaluated the repeated sense of hunger is a high-risk factor for the development of metabolic syndrome and its underlying mechanisms in animal model.

## Materials and Methods

### Animals and Experiment Design

Specific pathogen-free 3-week-old (3W; n = 20) and 6-week-old (6W; n = 20) male ICR mice were purchased from a commercial animal breeder, Daehan Biolink (Gyeongido, Korea). Mice were

housed in an environmentally controlled room at 22±2°C, 55% ±10% relative humidity and a 12-h light/dark cycle. Mice were fed commercial pellets (Koatech, Gyeongido, Korea) and tap water *ad libitum* for 1 week. Total 40 mice were randomly divided into two groups consisting of 10 mice in each group: (1) the *ad libitum* (AL) food intake groups in both age of 3W and 6W (3W-AL and 6W-AL), and (2) the food restriction (FR) groups (alternate day food intake with only 1/3 of average eating amount group) in both age of 3W and 6W (3W-FR and 6W-FR) respectively. The food restriction experiment was lasted for 8 weeks. This animal experiment was approved by the Institutional Animal Care and Use Committee of Daejeon University (DJUAR2012-010) and was conducted in accordance with the Guide for the Care and Use of Laboratory Animals published by the U.S. National Institutes of Health (Bethesda, MD).

**Measurement of Food Intake, Body Weight and Organ Weight**

Food intake was monitored daily and body weight was measured twice weekly. In final day, all mice were anesthetized with ether after 12 h of fasting and whole blood was collected *via* the abdominal aorta. The liver, muscle and fat pads (visceral adipose tissue, VAT; retroperitoneal adipose tissue, RAT; and epididymal adipose tissue, EAT) were removed, weighed and frozen in liquid nitrogen or stored in RNAlater™ (Qiagen, Valencia, CA, USA). Brain was quickly removed and the hypothalamus was dissected for gene expression analysis (n = 5) or western blot analysis (n = 5). Histological examinations of samples were fixed in 10% formalin solution for 24 h.

**Serum Biomarker Analysis**

All parameter concentrations were measured using sera obtained from fasting blood, which was previously clotted (15 min, room temperature) and centrifuged (15 min, 1000 × g).

The serum samples were then frozen immediately at -80°C until further analysis. The serum levels of aspartate aminotransferase (AST), alanine aminotransferase (ALT), alkaline phosphatase (ALP), total cholesterol, high-density lipoprotein (HDL), triglycerides and glucose were determined using an autoanalyzer (Chiron, Emeryville, CA, USA).

**Determination of Serum Adipokines and Cytokines**

Serum leptin, tumor necrosis factor-α (TNF-α) and interleukin-6 (IL-6) levels were measured using commercially available enzyme-linked immunoassay (ELISA) kits according to the manufacturer’s instructions (R&D Systems, Minneapolis, MN, USA). Serum ghrelin concentrations were measured using a commercial ELISA kit (RayBiotech Inc., Norcross, GA, USA) and serum levels of adiponectin and resistin were measured using a commercial ELISA kit (AdipoGen, Inc., Seoul, Korea). Standard curves were generated, from which protein concentrations were calculated.

**Determination of Lipid Level in Liver Tissue**

Livers were homogenized in PBS and the protein concentrations were determined. Liver homogenate (300 μL) was extracted with 5 mL of chloroform/methanol (2:1) and 0.5 mL of 0.1% sulfuric acid [14]. An aliquot of the organic phase was collected, dried under nitrogen and resuspended in 2% Triton X-100. Hepatic triglyceride and cholesterol content were determined using commercially available kits (Asan Pharm. Co., Seoul, Korea).

**Histopathological Analysis of Fatty Liver and Adiposity**

For histopathological evaluation, freshly isolated liver was fixed in 10% formalin for 24 h. The liver was dissected under a stereomicroscope, embedded in Tissue-Tek OCT compound (Sakura Finetek, Inc., Torrance, CA, USA), and placed on a cryotome model CM 1850 (Leica Microsystems, Wetzlar,

**Table 1.** Target genes and their primary sequences.

| Target genes | Accession No. | Gene sequences          |                         |
|--------------|---------------|-------------------------|-------------------------|
|              |               | Forward                 | Reverse                 |
| FAS          | NM_007988     | TGTGAGTGGTTGAGGCGCAT    | TTCTGTAGTCCAGCAAGCT     |
| SREBP-1c     | NM_011480     | GAGCGAGCGTTGAACTGTAT    | ACTTCAACGATGGGGACTTG    |
| IL-6         | NM_031168     | GCTACCTGGAGTACATGAAG    | CTGTGACTCCAGCTTATCTG    |
| PPARα        | NM_001113418  | CCTGAACATCGAGTGTGCGAA   | GTA CTGGCATTGTTCGGGT    |
| PPARγ        | NM_001127330  | TGGGAGATTCTCCTGTTGAC    | AGGTGGAGATGCAGGTTCTA    |
| AMPK         | NM_001013367  | TTGTTGGATTCCTGATATTGATG | GGCAAGATCGATAGTTGCTGATG |
| SCD-1        | NM_009127     | ACGCCGACCCTCACAATTC     | AGTTTTCCGCCCTTCTCTTTG   |
| NPY          | NM_023456     | CGCTCTGCGACACTACATCAA   | CGTTTTCTGTGCTTCTCCTCATT |
| AgRP         | NM_001271806  | GTTGCTGAGTTGTGTTCTGC    | AACTTCTTCTGCTCGGTCTG    |
| POMC         | NM_001278581  | ACGTGGAAGATGCCGAGATT    | TTCATCTCCGTTGCCAGGAA    |
| MC4R         | NM_016977     | GGTCGAAACCATCGTCATT     | TGAAATACCTGTCCACC GCA   |
| Resistin     | NM_001204959  | CCACTGTGTCCCATCGATGA    | GGAGGAGACTGTCCAGCAATT T |
| Adiponectin  | NM_009605     | CCTCTTAATCTGCCAGTCAT    | GCCATCCAACCTGCACAAGT    |
| Leptin       | NM_008493     | CAGAGGGTCACTGGCTTGGA    | AGGCTGGT GAGGACCTGTTG   |
| Glut4        | NM_009204     | CTGCTTCTGGCTCACAGTACTC  | CCAGGTTCCGGATGATGTAGA   |
| β-actin      | NM_007393     | AGGCTGTGCTGTCCCTGTATG   | TGGCTGAGGGAGAGCAT       |

Gene expressions were measured using visceral adipose tissues for FAS, SREBP-1c, IL-6, resistin, adiponectin and leptin, brain tissues for POMC, NPY, MC4R and AgRP, hepatic tissues for SREBP-1c, FAS, PPARγ, SCD-1, PPARα and AMPK, and muscle tissues for GLUT4, AMPK and PPARα respectively.

doi:10.1371/journal.pone.0098276.t001

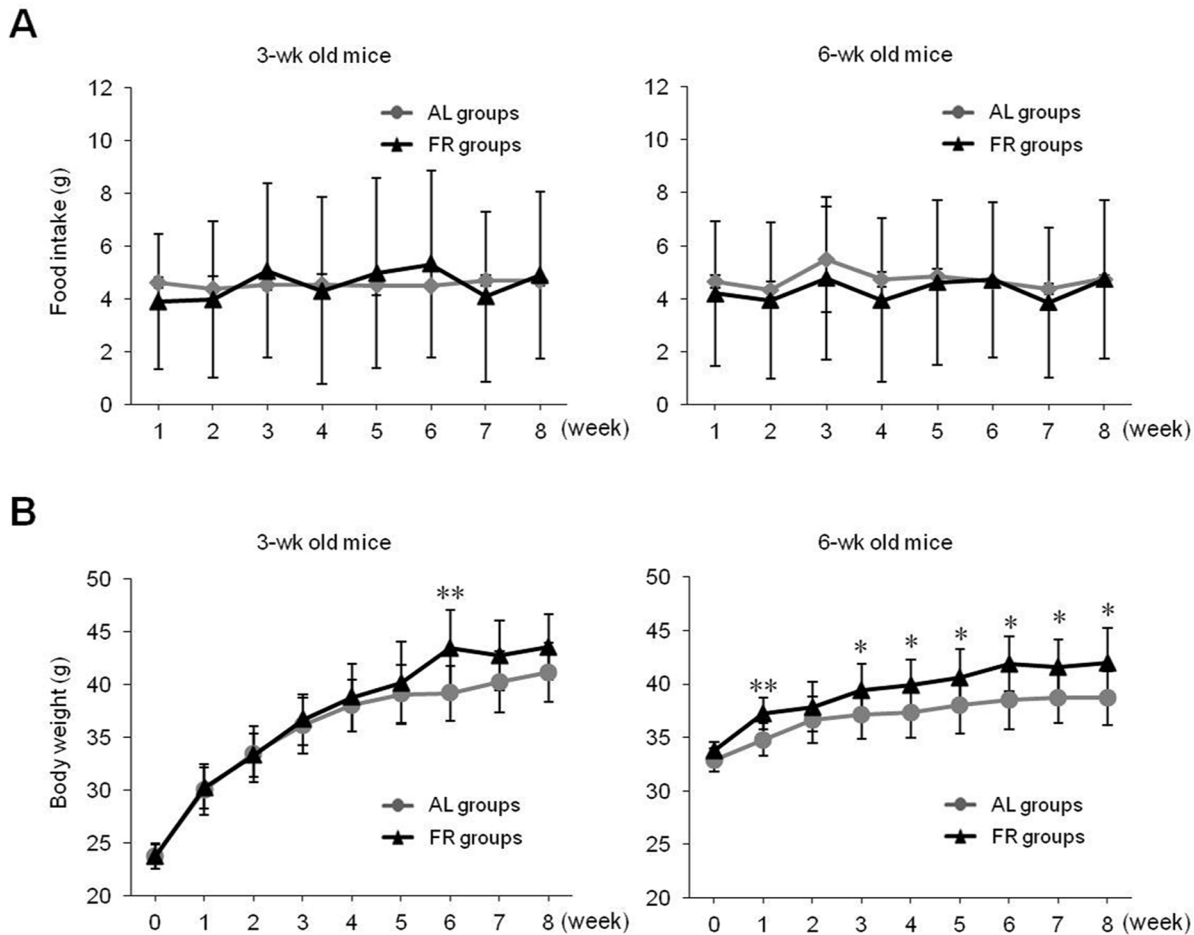

**Figure 1. Food intake and body weight.** (A) Food intake was monitored daily. (B) The body weight was measured twice weekly. Each point represents the mean  $\pm$  standard deviation (SD; n = 10). \* $p < 0.05$ , \*\* $p < 0.01$  compared with the AL group. doi:10.1371/journal.pone.0098276.g001

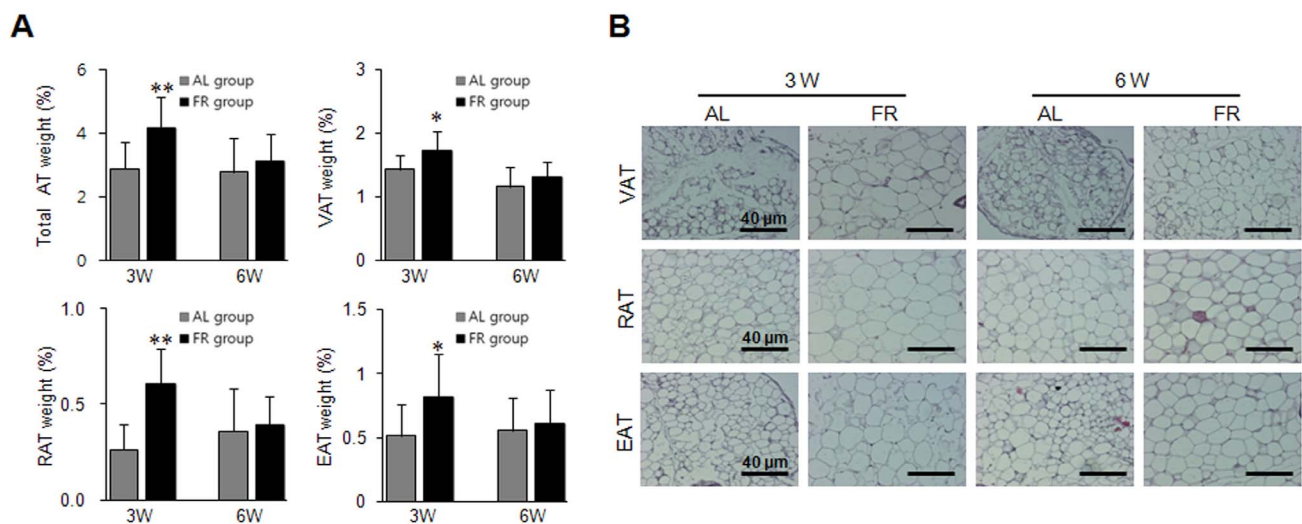

**Figure 2. Fat pad weight and histological findings of adipose tissues.** (A) The fat pads were weighed from visceral adipose tissue (VAT), retroperitoneal adipose tissue (RAT) and epididymal adipose tissue (EAT). Data are expressed as means  $\pm$  SD (n = 10). \* $p < 0.05$ , \*\* $p < 0.01$  compared with the AL group. (B) After hematoxylin and eosin (H&E) staining, the histological differences of adipose tissues were examined under a microscope (Scale bars: 40  $\mu$ m). doi:10.1371/journal.pone.0098276.g002

**Table 2.** Food intake, body and liver weight, and serum biochemistry parameters.

| Groups                    | 3W              |             | 6W          |             |             |
|---------------------------|-----------------|-------------|-------------|-------------|-------------|
|                           | AL (n = 10)     | FR (n = 10) | AL (n = 10) | FR (n = 10) |             |
| Food intake (g/day)       | 4.56±0.25       | 4.56±3.23   | 4.73±0.43   | 4.34±2.95   |             |
| Body weight               | Initial day (g) | 23.7±1.2    | 23.7±1.1    | 32.9±1.1    |             |
|                           | Final day (g)   | 41.2±2.8    | 43.5±3.1    | 38.7±2.5    | 42.1±2.85*  |
|                           | Weight gain (g) | 17.4±3.3    | 19.8±3.5    | 5.8±16.7    | 8.7±3.0*    |
| Liver weight              | Absolute (g)    | 1.5±0.1     | 1.7±0.1**   | 1.33±0.14   | 1.63±0.14** |
|                           | Relative (%)    | 3.65±0.29   | 3.99±0.13** | 3.44±0.26   | 3.90±0.46*  |
| Total cholesterol (mg/dL) | 112.6±14.6      | 131.2±13.7* | 122.7±10.1  | 140.1±17.0* |             |
| LDL (mg/dL)               | 26.6±10.8       | 30.0±5.9    | 30.5±6.6    | 44.2±10.7*  |             |
| HDL (mg/dL)               | 73.7±8.2        | 79.5±6.7    | 73.2±16.7   | 78.9±12.1   |             |
| Triglyceride (mg/dL)      | 93.7±17.2       | 91.2±9.1    | 96.2±12.4   | 85.0±5.3    |             |
| Glucose (mg/dL)           | 79.2±12.35      | 88.3±7.9    | 78.5±12.8   | 95.0±9.6*   |             |
| AST (IU/L)                | 58.0±10.8       | 58.3±16.3   | 48.5±12.4   | 66.8±16.2*  |             |
| ALT (IU/L)                | 29.5±10.6       | 39.9±13.7   | 26.2±11.5   | 38.7±24.7   |             |
| ALP (IU/L)                | 43.8±10.5       | 55.0±16.2   | 33.1±14.1   | 36.8±9.9    |             |

Data are expressed as means ± SD. \* $p < 0.05$ , \*\* $p < 0.01$  compared with the AL group.  
doi:10.1371/journal.pone.0098276.t002

Germany). Livers were cut into 10- $\mu$ m slices, mounted on slides and allowed to dry for 1–2 h. The sections were fixed in 10% formalin for 10 min and then the slides were rinsed with PBS (pH 7.4). After air-drying, the slides were placed in 100% propylene glycol for 2 min and stained in 0.5% Oil Red O solution in propylene glycol for 30 min. The slides were transferred to an 85% propylene glycol solution for 1 min, rinsed in distilled water for 2 changes and processed for hematoxylin counterstaining. For the histological evaluation, freshly white adipose tissues (VAT, RAT and EAT) were fixed in 10% formalin for 24 h. Following sufficient rinsing under flowing water, tissues were processed in a paraffin automatic processor using a programmed cascade. The paraffin-embedded samples were dissected into 4- $\mu$ m-thick sections and stained with hematoxylin-eosin (H&E). After H&E staining for adipose tissues, representative histological features such as adiposity were observed under a microscope. Liver and adipose tissue images were captured with a BX51 microscope (Olympus, Japan).

#### qRT-PCR Analysis

Total RNAs were extracted from liver, muscle, brain and adipose tissue samples with TRIzol reagent (Molecular Research Center, Cincinnati, OH, USA). The cDNA was synthesized from total RNA (2  $\mu$ g) in a 20- $\mu$ L reaction using a high-capacity cDNA reverse transcription kit (Ambion, Austin, TX, USA). Quantitative real-time polymerase chain reaction (qRT-PCR) was performed using SYBR Green PCR Master Mix (Applied Biosystems, Foster City, CA, USA) to determine gene expression for fatty acid synthase (FAS), sterol regulatory element-binding protein-1c (SREBP-1c), IL-6, proliferator-activated receptor alpha (PPAR- $\alpha$ ), peroxisome proliferator-activated receptor gamma (PPAR- $\gamma$ ), AMP-activated protein kinase (AMPK), stearoyl-CoA desaturase-1 (SCD-1), neuropeptide Y (NPY), agouti-gene related protein (AgRP), proopiomelanocortin (POMC), melanocortin receptor-4 (MC4R), resistin, adiponectin, leptin and  $\beta$ -actin with the IQ5 PCR Thermal Cycler (Bio-Rad, Hercules, CA, USA). Primers used are described in Table 1. Reactions were performed with 12.5  $\mu$ L of SYBRGreen PCR Master Mix, 1  $\mu$ L of 10 pmol/L

primer pair, 10.5  $\mu$ L of distilled water and 1  $\mu$ L of cDNA. Each PCR run was performed under the following conditions: initial denaturation at 95°C for 5 min and 40 amplification cycles of denaturation at 95°C for 1 min, annealing at 58°C for 40 s, and elongation at 72°C for 40 s, followed by a single fluorescence measurement. For data analysis, the gene expression levels were compared with  $\beta$ -actin as a reference gene.

#### Western Blot Analysis

Hypothalamus of brain tissues were homogenized in ice-cold RIPA buffer supplemented with protease (Calbiochem, San Diego, CA, USA) and phosphatase (Sigma-Aldrich, St. Louis, MO, USA) inhibitors. Protein concentrations were determined using the bicinchoninic acid (BCA) protein assay (Sigma-Aldrich). Equal amounts of protein extracts (50  $\mu$ g) were fractionated by SDS-PAGE and transferred to 0.45- $\mu$ m nitrocellulose membranes. Membrane blocking was performed by incubating for 1 h at room temperature with 5% nonfat dry milk in Tris-buffered saline containing 0.1% Tween-20. Then, the membranes were incubated overnight at 4°C with the POMC and actin primary antibody (Santa Cruz Biotechnology, Santa Cruz, CA, USA) at a 1:1000 dilution. The blots were washed three times with washing buffer (20 mM Tris, 160 mM NaCl and 0.1% Tween 20), followed by a 1-h incubation with the appropriate horseradish peroxidase-conjugated secondary antibody. The peroxidase activity was detected using the Immobilon Western HRP detection reagent (Millipore, Billerica, MA, USA) using an Image Reader (Thermo Fisher Scientific, Pittsburgh, PA, USA).

#### Statistical Analysis

Statistical significance was analyzed by one-way analysis of variance (ANOVA) followed by Dunnett's post hoc test using the JMP 5.1 software (SAS Institute, Cary, NC, USA). The results are expressed as means ± standard deviation (SD). In all analyses, \* $p < 0.05$  or \*\* $p < 0.01$  indicated significance.

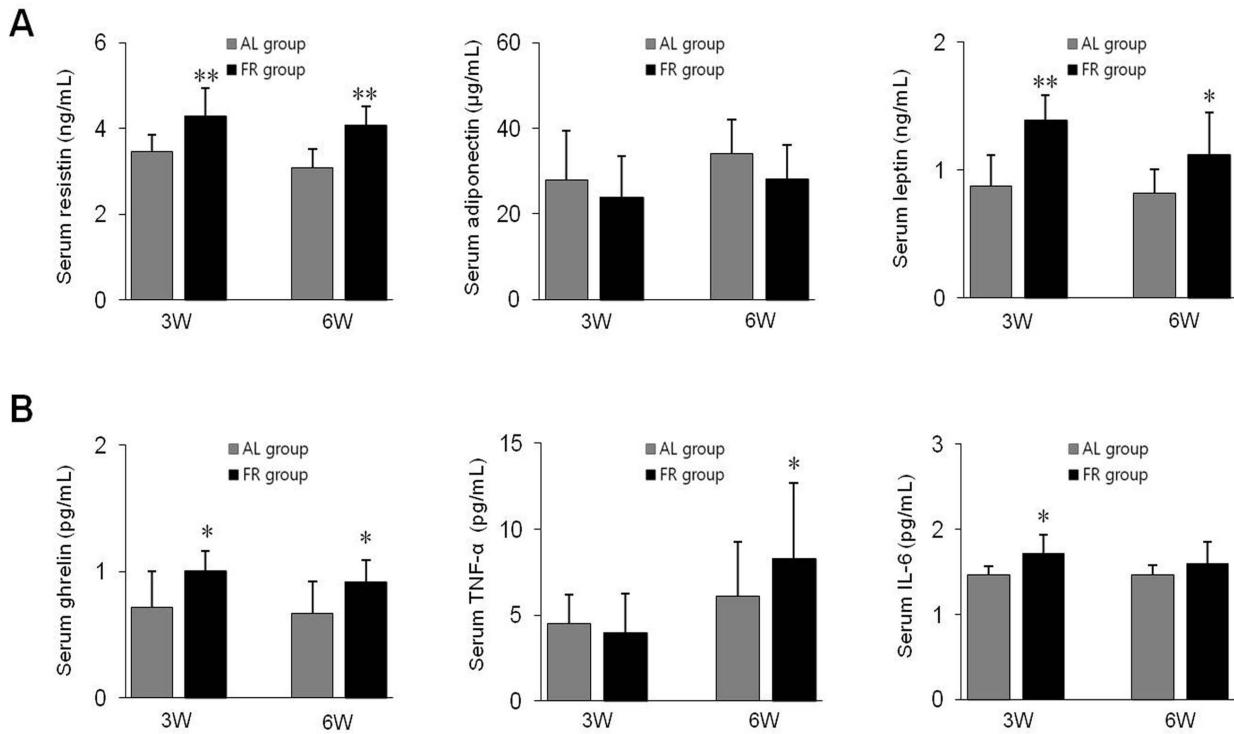

**Figure 3. Serum protein levels of metabolic and proinflammatory mediators.** (A) The protein levels of resistin, adiponectin and leptin as well as (B) ghrelin, tumor necrosis factor- $\alpha$  (TNF- $\alpha$ ) and interleukin-6 (IL-6) in serum were analyzed by ELISA. Data are expressed as means  $\pm$  SD (n = 10). \* $p$ <0.05, \*\* $p$ <0.01 compared with the AL group. doi:10.1371/journal.pone.0098276.g003

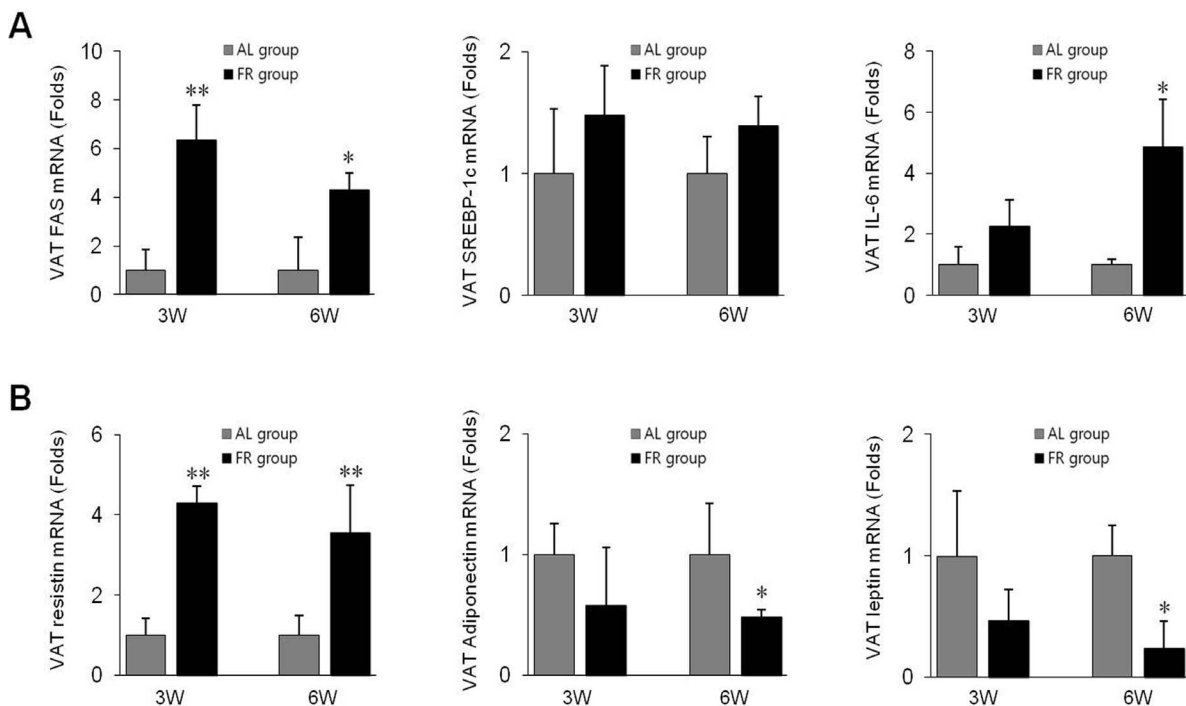

**Figure 4. Gene expression levels in visceral adipose tissue (VAT).** (A) The mRNA expression levels of fatty acid synthase (FAS), sterol regulatory element-binding protein-1c (SREBP-1c) and interleukin-6 (IL-6) as well as (B) resistin, adiponectin and leptin were determined using qRT-PCR analysis. Data are expressed as means  $\pm$  SD (n = 10, fold change relative to the AL group). \* $p$ <0.05, \*\* $p$ <0.01 compared with the AL group. doi:10.1371/journal.pone.0098276.g004



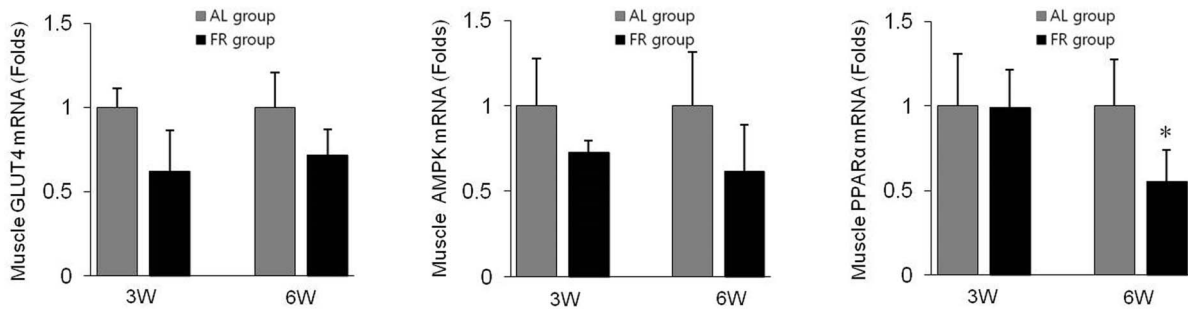

**Figure 5. Gene expression levels in skeletal muscles.** The mRNA levels of glucose transporter 4 (GLUT4), AMP-activated protein kinase (AMPK) and proliferator-activated receptor alpha (PPARα) were determined using qRT-PCR analysis. Data are expressed as means ± SD (n = 10, fold change relative to AL group). \**p*<0.05 compared with the AL group. doi:10.1371/journal.pone.0098276.g005

**Results**

**Food Intake and Weight of Body, Liver and Adipose Tissues**

After the 8-week experiment using two different feeding conditions, the food intake per week and throughout the 8-week experiment in the FR groups was nearly identical or slightly lower than AL groups in 3W and 6W mice, respectively (Figure 1A and Table 2). However, the body weight and weight gain were higher in the FR groups compared to the AL groups on final day (*p*<0.05 in 6W group, Figure 1B and Table 2). Additionally, the relative liver weight was significantly higher in the FR groups compared with the AL groups (*p*<0.01, Table 2). The total weight of adipose tissues was significantly higher in the FR group than the AL group, particularly in 3W mice (*p*<0.01, Figure 2A). The same patterns were observed for each regional analysis of VAT (*p*<0.05 in 3W group), RAT (*p*<0.01 in 3W group), and EAT (*p*<0.05 in 3W group, Figure 2A). Histological findings revealed the size of

adipocytes was markedly increased in the FR groups compared with the AL groups (Figure 2B).

**Serum Levels of Metabolic and Inflammatory Mediators**

The serum resistin levels were significantly higher in the FR groups compared to the AL groups (*p*<0.01). Serum adiponectin levels were slightly lower in the FR groups (*p*>0.05), whereas leptin levels were significantly increased in the FR groups compared to the AL groups (*p*<0.05 in 6W group, *p*<0.01 in 3W group, Figure 3A). The serum ghrelin levels were significantly increased in the FR groups compared to the AL groups (*p*<0.05, Figure 3B).

In addition, the serum levels of the inflammatory cytokines, TNF-α and IL-6, were significantly higher in the FR groups compared with the AL groups (*p*<0.05 in 6W group for TNF-α, and *p*<0.05 in 3W group for IL-6, Figure 3B).

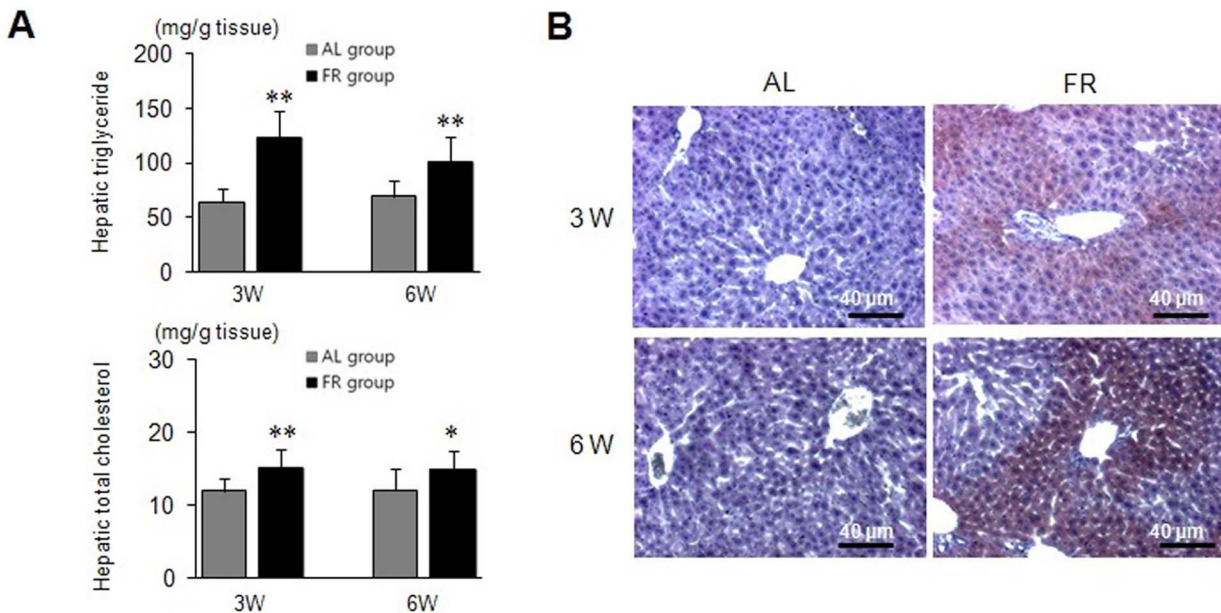

**Figure 6. Measurement of hepatic steatosis.** (A) Hepatic triglycerides and cholesterol were measured using commercially available kits. Data are expressed as means ± SD (n = 10, respectively). \**p*<0.05, \*\**p*<0.01 compared with the AL group. (B) Hepatic tissues were evaluated using Oil Red O staining and the histological differences were examined under a microscope (Scale bars: 40 μm). doi:10.1371/journal.pone.0098276.g006

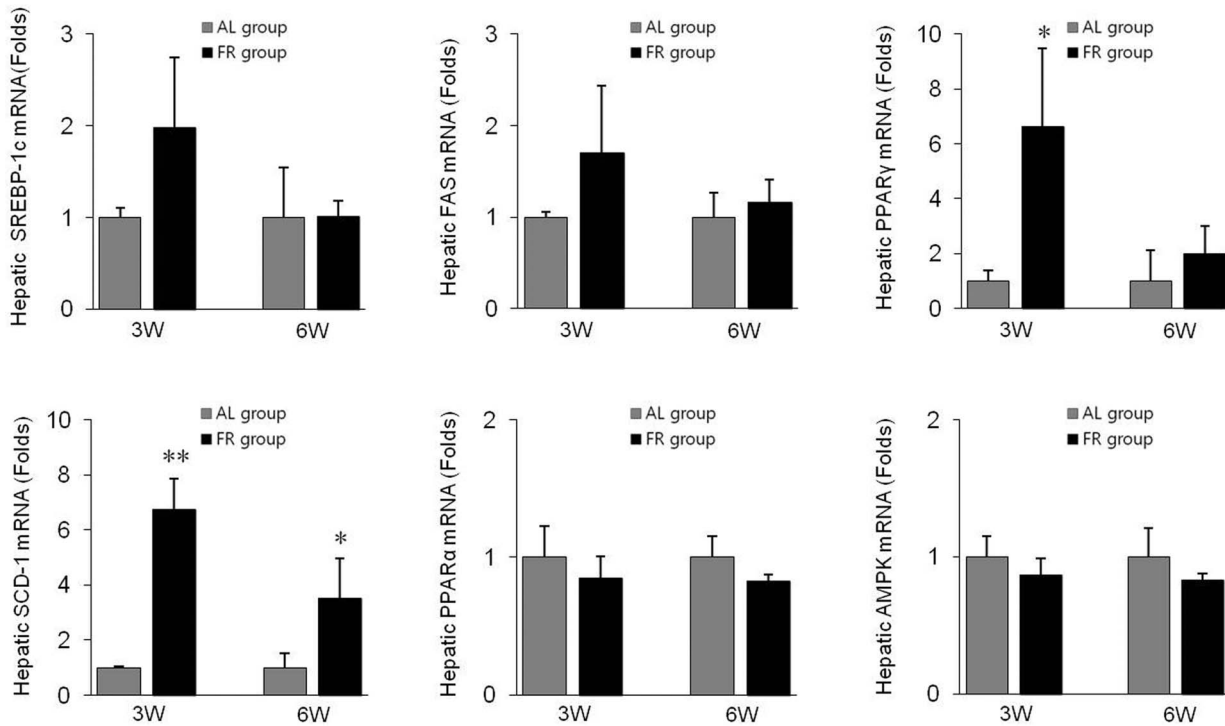

**Figure 7. Gene expression levels in the liver.** The mRNA levels of sterol regulatory element-binding protein-1c (SREBP-1c), fatty acid synthase (FAS), proliferator-activated receptor gamma (PPAR $\gamma$ ), stearoyl-CoA desaturase-1 (SCD-1), proliferator-activated receptor alpha (PPAR $\alpha$ ) and AMP-activated protein kinase (AMPK) were determined using qRT-PCR. Data are expressed as means  $\pm$  SD (n = 10, fold change relative to the AL group). \* $p$ <0.05, \*\* $p$ <0.01 compared with the AL group. doi:10.1371/journal.pone.0098276.g007

### Serum Levels of Lipid Profiles and Glucose

The FR groups showed high levels of total cholesterol ( $p$ <0.05) and low-density lipoprotein (LDL) cholesterol ( $p$ <0.05 in 6W group, Table 2). However, no significant difference was observed in HDL and triglycerides between the two groups. The FR groups showed a pattern of high glucose level compared with the AL groups ( $p$ <0.05 in 6W group, Table 2).

### Adipogenic and Metabolic Gene Expressions in Adipose Tissues

Based on the mRNA levels of fat accumulation-related and adipokine genes in VATs, the expression levels of FAS and SREBP-1c were significantly upregulated in the FR groups compared to the AL groups (Figure 4A). In addition, the mRNA level of resistin was significantly upregulated ( $p$ <0.01), whereas those of adiponectin and leptin were downregulated in the FR groups compared to the AL groups ( $p$ <0.05 in 6W group, Figure 4B).

### Glucose Uptake-related Gene Expressions in Muscle Tissues

Based on the expression levels of glucose uptake genes in femoral muscle tissues, FR groups showed downregulated expression of glucose transporter 4 (GLUT4), AMPK and peroxisome PPAR $\alpha$  compared with the AL groups. However, only PPAR $\alpha$  expression showed a significant difference between the two groups ( $p$ <0.05 in 6W group, Figure 5).

### Lipid Levels, Inflammation Enzymes and Lipogenic Gene Expression in Hepatic Tissues

The FR groups showed significant hepatic steatosis, as evidenced by the increased hepatic triglycerides ( $p$ <0.01) and cholesterol ( $p$ <0.05 in 6W group,  $p$ <0.01 in 3W group) levels compared to the AL groups (Figure 6A); moreover, larger lipid droplets were observed in the histopathological findings (Figure 6B). The FR groups showed elevated hepatic enzyme levels (AST, ALT and ALP) compared to the AL groups ( $p$ <0.05 in 6W group for AST, Table 2).

In addition, the FR groups showed marked upregulation of hepatic lipogenic genes, including SREBP-1c, FAS, PPAR $\gamma$  and SCD-1, compared to the AL groups, while the energy expenditure-related genes, PPAR $\alpha$  and AMPK, were downregulated in the FR groups (Figure 7).

### Protein and Gene Expression Levels of Appetite-related Neuropeptides in Brain Tissues

The expression of the anorexigenic POMC was highly activated at both the protein and mRNA levels in the FR groups compared with the AL groups (Figure 8A and B), and the expression of the orexigenic NPY gene was downregulated in the FR groups. Regarding the two other hunger-related genes, the expression of MC4R was significantly downregulated ( $p$ <0.05 in 3W group), while that of AgRP was not changed significantly in the FR group (Figure 8C).

### Discussion

A few clinical data anticipated that eating at regular times and proper food quantity are crucial for maintaining a healthy status

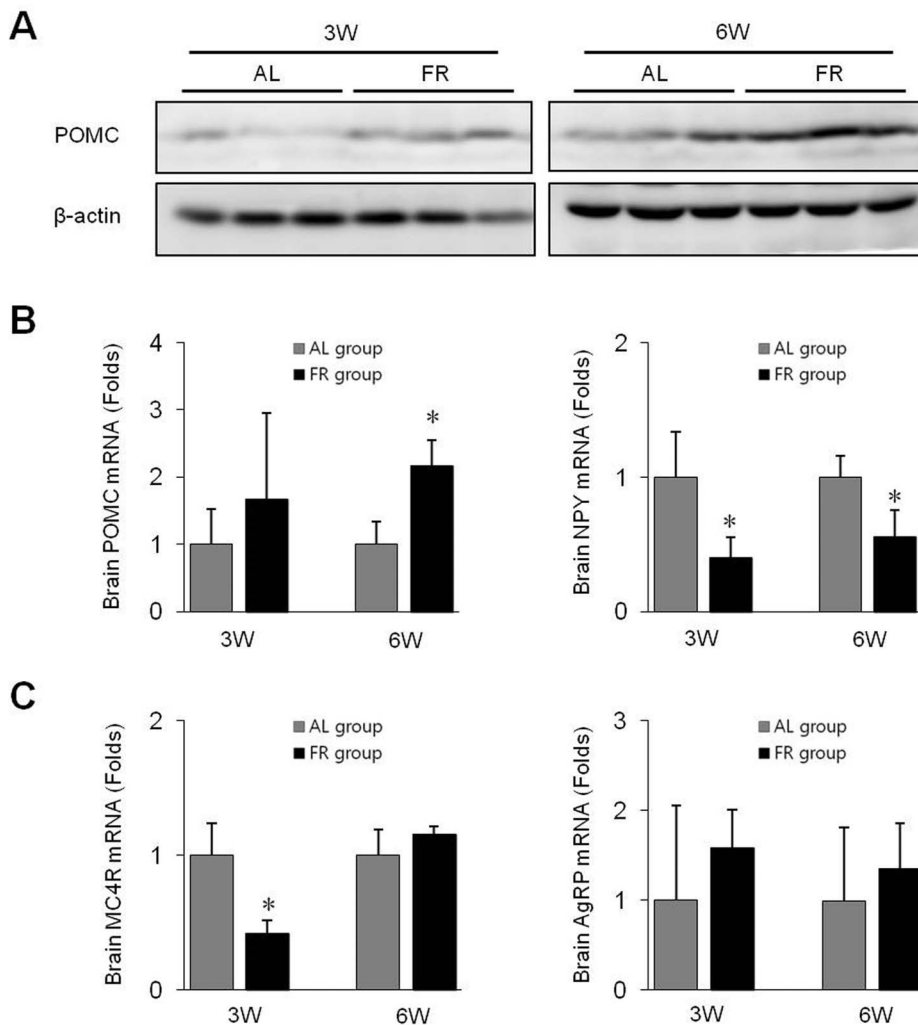

**Figure 8. Protein and gene expression levels in the brain.** (A) Proopiomelanocortin (POMC) activity was analyzed by Western blotting ( $n = 5$ ). (B) The mRNA levels of POMC and neuropeptide Y (NPY) as well as (C) melanocortin receptor-4 (MC4R) and agouti-gene related protein (AgRP) were determined using qRT-PCR. Data are expressed as means  $\pm$  SD ( $n = 5$ , fold change relative to the AL group). \* $p < 0.05$  compared with the AL group. doi:10.1371/journal.pone.0098276.g008

[8,9]. However, many people in developed countries do not follow a regular eating schedule due to a busy lifestyle. Herein, we showed in a mouse model that a repeated sense of hunger led to a high risk for the development of visceral obesity and metabolic syndrome. At the end of 8 weeks, the total food intake in the FR groups (subjected to an 8-week repeated pattern of partial restriction diet on one day followed by compensatory overeating the next day) was slightly lower than the AL groups (fed daily using a normal feeding pattern). However, the final body weight and weight gain were higher in the FR groups than the AL groups. Consequently, the FR groups showed pathological conditions characteristic of metabolic syndrome, including a distinct visceral obesity, hyperlipidemia, hyperglycemia and hepatic steatosis.

Metabolic syndrome is a disorder that includes several conditions; e.g., obesity, dyslipidemia and hyperglycemia [15]. Obesity is a principle causative factor in the development of metabolic syndrome and is related to a higher level of lipid accumulation in liver, skeletal muscle and adipose tissues [16,17]. The FR groups showed significantly elevated serum levels of total cholesterol and LDL cholesterol in our study. In obese conditions, adipocytes accumulate large amounts of lipids and become

enlarged. Especially in obese adults, the change in adipocyte size is more important than the number of adipocytes [18]. As expected, VAT weight was significantly increased in the FR groups, which was in accordance with the histological analysis, showing a markedly enlarged size of adipocytes. Lipogenesis generally occurs in differentiated adipocytes, which store fatty acids in the form of triglycerides *via* several cytoplasmic enzymes including SCD-1, SREBP-1c, and FAS [19]. In our study, the mRNA expression levels of FAS and SREBP-1c in adipose tissues were significantly upregulated in the FR groups compared to the AL groups.

Three main adipokines, resistin, adiponectin and leptin are adipocyte-secreted molecules that act as core contributors to the development or regulation of obesity, insulin resistance and hepatic steatosis [20]. Resistin plays a central role in the differentiation of adipocytes leading to increased obesity and insulin resistance [21,22], while adiponectin acts as a potent inhibitor of the inflammatory reaction in obese subjects [23]. A high serum resistin level but low adiponectin level has been noted in an obese population [24]. Leptin plays a key role in the long-term regulation of body weight and energy homeostasis *via* control



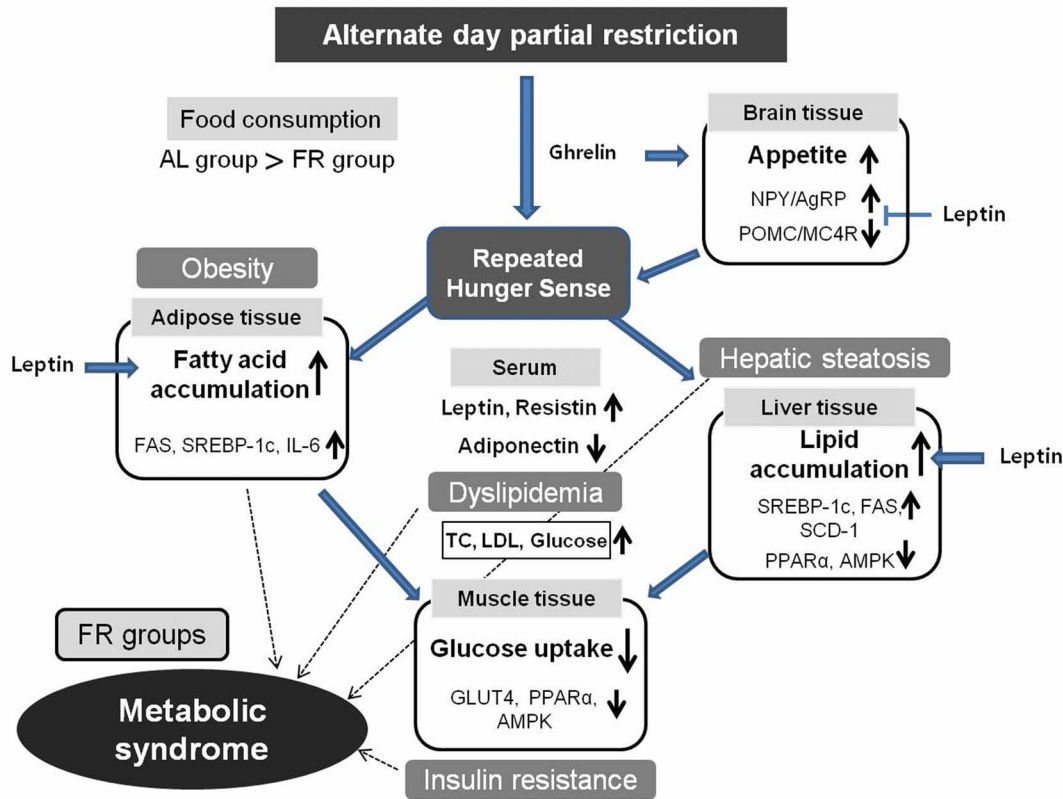

**Figure 9. Graphical summary of the metabolic syndrome by a repeated hunger sense.**  
doi:10.1371/journal.pone.0098276.g009

of appetite [25,26]. As our expectation, results from our study showed significantly high serum resistin levels but low adiponectin levels in the FR groups compared to the AL groups. Additionally, serum leptin levels were significantly increased in the FR groups. A previous report demonstrated that serum leptin levels were significantly higher in an obese group than a lean group, with a close correlation to body weight [27]. Thus, leptin is a significant indicator of metabolic syndrome, and the same relationship between leptin and obesity creates a high risk factor for the development of metabolic syndrome [28]. Ghrelin is known as a hormone maintaining appetite leading to storage of energy accumulation in adipose tissue, similar to adipokines [29,30]; our results showed higher serum ghrelin levels in the FR groups.

Previous studies demonstrated that fat accumulation leads to chronic inflammation during obesity progression [31,32]. The representative inflammatory cytokines, TNF- $\alpha$  and IL-6, were increased under the obesity condition. Along with adipokines, these two cytokines are recognized as markers of the metabolic syndrome-like condition, characterized by abdominal obesity, hyperlipidemia and hyperglycemia [33,34]. In our study, the FR groups showed significantly higher levels of serum TNF- $\alpha$  and IL-6 compared to the AL groups.

Excess visceral fat also increases the risk for the development of insulin resistance, a typical feature of metabolic syndrome [35,36]. Moreover, an elevated serum leptin level is known to correlate closely with insulin resistance [37]. In our results, serum leptin and glucose levels in the FR groups were significantly elevated compared to the AL groups. A human clinical trial showed that the relationship between leptin and glucose serum levels was more significant in an older population [38], similar to our results between the 6W and 3W groups. GLUT4 is a glucose transport

protein found in adipose tissues and skeletal muscle [39]. The gene expression level of GLUT4 in skeletal muscle was reduced under the diabetic condition in an animal model [40] as well as in humans [41]. GLUT4 is regulated by AMPK and PPAR $\alpha$ , and considerable evidence supports the AMPK-mediated process protects against insulin resistance [42]. We investigated the GLUT4 expression in femoral muscle tissue, which provided additional information regarding the high glucose level. The FR groups showed a marked downregulation of GLUT4 mRNA levels in muscle compared with the AL groups. Similar results were observed in AMPK and PPAR $\alpha$  levels in the FR groups compared with the AL groups.

The liver is a central organ of fat metabolism and hepatic steatosis and consequential liver injury are observed frequently in patients with metabolic syndrome [43]. High serum leptin levels and insulin resistance are contributors to the pathogenesis of hepatic steatosis [44]. The FR groups showed significant hepatic steatosis evidenced by the notable lipid droplets and the increase of hepatic triglycerides and cholesterol levels compared to the AL groups. The major lipogenic genes, SREBP-1c, FAS, SCD-1 and PPAR $\gamma$  are involved in *de novo* lipogenesis in hepatic tissues [45]. Noticeable upregulation of hepatic lipogenic genes including SREBP-1c, FAS and SCD-1 was evident in the FR groups, while the energy expenditure-related genes, PPAR $\alpha$  and AMPK were downregulated.

The above results suggest that a repeated sense of hunger alters the quantitative changes in adipokines as well as cytokines leading to metabolic-syndrome-like conditions such as abdominal obesity, dyslipidemia, hepatic steatosis and hyperglycemia tendency (Figure 9). This pathological state is thought to be linked to diet control in the brain. The brain responds to hunger *via* several

neuropeptides/receptor interactions that originate from the hypothalamus such as the orexigenic NPY-AgRP neurons and the anorexigenic POMC-MC4R neurons [46,47]. The sense of hunger increases the NPY activity but decreases the POMC activity, which leads to increased appetite [48,49]. The partial food restriction on one day was followed by compensatory overeating on the next day; accordingly we expected the sense of hunger to be activated. However, the FR groups showed highly activated POMC but suppressed NPY, which resulted from the elevated serum leptin levels. The chronic elevation of serum leptin concentration inhibits NPY production and increases POMC in the hypothalamic neurons [49,50].

These findings are based on an animal model, which has inevitable limitations; however our data were obtained from duplicated experiments (using 3- and 6-week-old mice) as well as another BALB/c mice model. Recently, modified diet patterns have been considered for reducing calories, including skipping regular meals, alternate day fasting or intermittent fasting. These are effective in reducing body weight and increasing longevity [51,52]. However, uncontrolled eating habits with alternate day compensatory overeating could evoke metabolic syndrome-like

disorders. Accordingly, we can conclude that the repeated sense of hunger in an animal model induced the typical characteristics of metabolic syndrome; distinct visceral obesity, hyperlipidemia, hyperglycemia and hepatic steatosis and the main underlying mechanisms involve the imbalance of adipokines, particularly leptin. Our findings are first experimental evidence to clearly show the importance of maintaining a regular daily meal schedule for the prevention of metabolic syndrome.

## Acknowledgments

The English in this document has been checked by at least two professional editors, both native speakers of English. For a certificate, please see: <http://www.textcheck.com/certificate/6lpLoE>.

## Author Contributions

Conceived and designed the experiments: JMH HGK CGS. Performed the experiments: JMH HGK JSL MKC CGS. Analyzed the data: JMH HGK JSL MKC YAK CGS. Contributed reagents/materials/analysis tools: MKC YAK. Wrote the paper: JMH CGS.

## References

- WHO (2011) Obesity and Overweight: Factsheet No 311. World Health Organization.
- Devlin MJ, Yanovski SZ, Wilson GT (2000) Obesity: what mental health professionals need to know. *Am J Psychiatry* 157: 854–866.
- Wang T, Hung CC, Randall DJ (2006) The comparative physiology of food deprivation: from feast to famine. *Annu Rev Physiol* 68: 223–251. doi: 10.1146/annurev.physiol.68.040104.105739.
- Varela L, Horvath TL (2012) Leptin and insulin pathways in POMC and AgRP neurons that modulate energy balance and glucose homeostasis. *EMBO Rep* 13: 1079–1086. doi: 10.1038/embor.2012.174.
- Savino F, Liquori SA, Sorrenti M, Fissore MF, Oggero R (2011) Breast milk hormones and regulation of glucose homeostasis. *Int J Pediatr* 2011:303985. doi: 10.1155/2011/303985.
- Li L, Wang Z, Zuo Z (2013) Chronic intermittent fasting improves cognitive functions and brain structures in mice. *PLoS One* 8: e66069. doi: 10.1371/journal.pone.0066069.
- Anson RM, Guo Z, de Cabo R, Iyuni T, Rios M, et al. (2003) Intermittent fasting dissociates beneficial effects of dietary restriction on glucose metabolism and neuronal resistance to injury from calorie intake. *Proc Natl Acad Sci U S A* 100: 6216–6220. doi: 10.1073/pnas.1035720100.
- Ma Y, Bertone ER, Stanek EJ, 3rd, Reed GW, Hebert JR, et al. (2003) Association between eating patterns and obesity in a free-living US adult population. *Am J Epidemiol* 158: 85–92.
- Berg C, Lappas G, Wolk A, Strandhagen E, Toren K, et al. (2009) Eating patterns and portion size associated with obesity in a Swedish population. *Appetite* 52: 21–26. doi: 10.1016/j.appet.2008.07.008.
- Berg CM, Lappas G, Strandhagen E, Wolk A, Toren K, et al. (2008) Food patterns and cardiovascular disease risk factors: the Swedish INTERGENE research program. *Am J Clin Nutr* 88: 289–297. doi: 88/2/289 [pii].
- Jaakkola J, Hakala P, Isolauri E, Poussa T, Laitinen K (2013) Eating behavior influences diet, weight, and central obesity in women after pregnancy. *Nutrition* 29: 1209–1213.
- Bouguerra R, Jabrane J, Maatki C, Ben Salem L, Hamzaoui J, et al. (2006) [Ramadan fasting in type 2 diabetes mellitus]. *Ann Endocrinol (Paris)* 67: 54–59. doi: 10.1016/j.nut.2013.03.008.
- Saada DA, Attou GS, Mouhtadi F, Kassoul S, Italhi M, et al. (2008) Effect of the Ramadan Fasting on the Variations of Certain Anthropometric and Biochemical Parameters in Type 2 Diabetic Patients Treated with Medications Mixture (Biguanides and Sulfamides). *Advances in Biological Research* 2: 111–120.
- Carr TP, Andresen CJ, Rudel LL (1993) Enzymatic determination of triglyceride, free cholesterol, and total cholesterol in tissue lipid extracts. *Clin Biochem* 26: 39–42. doi: 0009-9120(93)90015-X [pii].
- Grundy SM, Brewer HB Jr, Cleeman JI, Smith SC Jr, Lenfant C (2004) Definition of metabolic syndrome: Report of the National Heart, Lung, and Blood Institute/American Heart Association conference on scientific issues related to definition. *Circulation* 109: 433–438. doi: 10.1161/01.CIR.0000111245.75752.C6.
- Unger RH, Scherer PE (2010) Gluttony, sloth and the metabolic syndrome: a roadmap to lipotoxicity. *Trends Endocrinol Metab* 21: 345–352. doi: 10.1016/j.tem.2010.01.009.
- Liu Q, Bengmark S, Qu S (2010) The role of hepatic fat accumulation in pathogenesis of non-alcoholic fatty liver disease (NAFLD). *Lipids Health Dis* 9: 42. doi: 10.1186/1476-511X-9-42.
- Arner E, Westermark PO, Spalding KL, Britton T, Ryden M, et al. (2010) Adipocyte turnover: relevance to human adipose tissue morphology. *Diabetes* 59: 105–109. doi: 10.2337/db09-0942.
- Weissman C (1999) Nutrition in the intensive care unit. *Crit Care* 3: R67–75.
- Hajer GR, van Haften TW, Visseren FL (2008) Adipose tissue dysfunction in obesity, diabetes, and vascular diseases. *Eur Heart J* 29: 2959–2971. doi: 10.1093/eurheartj/ehn387.
- Steppan CM, Bailey ST, Bhat S, Brown EJ, Banerjee RR, et al. (2001) The hormone resistin links obesity to diabetes. *Nature* 409: 307–312. doi: 10.1038/35053000.
- Kusminski CM, McTernan PG, Kumar S (2005) Role of resistin in obesity, insulin resistance and Type II diabetes. *Clin Sci (Lond)* 109: 243–256. doi: 10.1042/CS20050078.
- Yamauchi T, Kamon J, Waki H, Terachi Y, Kubota N, et al. (2001) The fat-derived hormone adiponectin reverses insulin resistance associated with both lipodystrophy and obesity. *Nat Med* 7: 941–946. doi: 10.1038/90984.
- Silha JV, Krsek M, Skrha JV, Sucharda P, Nyomba BL, et al. (2003) Plasma resistin, adiponectin and leptin levels in lean and obese subjects: correlations with insulin resistance. *Eur J Endocrinol* 149: 331–335.
- Frederich RC, Lollmann B, Hamann A, Napolitano-Rosen A, Kahn BB, et al. (1995) Expression of ob mRNA and its encoded protein in rodents. Impact of nutrition and obesity. *J Clin Invest* 96: 1658–1663. doi: 10.1172/JCI118206.
- Martins Mdo C, Lima Faleiro L, Fonseca A (2012) Relationship between leptin and body mass and metabolic syndrome in an adult population. *Rev Port Cardiol* 31: 711–719. doi: 10.1016/j.repc.2012.08.002.
- Schwartz MW, Peskind E, Raskind M, Boyko EJ, Porte D Jr (1996) Cerebrospinal fluid leptin levels: relationship to plasma levels and to adiposity in humans. *Nat Med* 2: 589–593.
- Yun JE, Kimm H, Jo J, Jee SH (2010) Serum leptin is associated with metabolic syndrome in obese and nonobese Korean populations. *Metabolism* 59: 424–429. doi: 10.1016/j.metabol.2009.08.012.
- Inui A, Asakawa A, Bowers CY, Mantovani G, Laviano A, et al. (2004) Ghrelin, appetite, and gastric motility: the emerging role of the stomach as an endocrine organ. *FASEB J* 18: 439–456. doi: 10.1096/fj.03-0641rev.
- Tschöp M, Smiley DL, Heiman ML (2000) Ghrelin induces adiposity in rodents. *Nature* 407: 908–913. doi: 10.1038/35038090.
- Kawasaki N, Asada R, Saito A, Kanemoto S, Imaizumi K (2012) Obesity-induced endoplasmic reticulum stress causes chronic inflammation in adipose tissue. *Sci Rep* 2: 799. doi: 10.1038/srep00799.
- Ye J, Keller JN (2010) Regulation of energy metabolism by inflammation: a feedback response in obesity and calorie restriction. *Aging (Albany NY)* 2: 361–368. doi: v2/n6/full/100155.html [pii].
- Harsch IA, Bergmann T, Koebernick C, Wiedmann R, Ruderich F, et al. (2007) Adiponectin, resistin and subclinical inflammation—the metabolic burden in Launois Bensaude Syndrome, a rare form of obesity. *J Physiol Pharmacol* 58 Suppl 1: 65–76.
- Brietze SA (2007) Controversy in diagnosis and management of the metabolic syndrome. *Med Clin North Am* 91: 1041–1061. doi: vii-viii. 10.1016/j.mcna.2007.06.005.
- Goodpaster BH, Thaete FL, Simonneau JA, Kelley DE (1997) Subcutaneous abdominal fat and thigh muscle composition predict insulin sensitivity independently of visceral fat. *Diabetes* 46: 1579–1585.

36. Hayashi T, Boyko EJ, McNeely MJ, Leonetti DL, Kahn SE, et al. (2008) Visceral adiposity, not abdominal subcutaneous fat area, is associated with an increase in future insulin resistance in Japanese Americans. *Diabetes* 57: 1269–1275. doi: 10.2337/db07-1378.
37. Segal KR, Landt M, Klein S (1996) Relationship between insulin sensitivity and plasma leptin concentration in lean and obese men. *Diabetes* 45: 988–991.
38. Monroe MB, Van Pelt RE, Schiller BC, Seals DR, Jones PP (2000) Relation of leptin and insulin to adiposity-associated elevations in sympathetic activity with age in humans. *Int J Obes Relat Metab Disord* 24: 1183–1187.
39. Olson AL, Pessin JE (1996) Structure, function, and regulation of the mammalian facilitative glucose transporter gene family. *Annu Rev Nutr* 16: 235–256. doi: 10.1146/annurev.nu.16.070196.001315.
40. Garvey WT, Huecksteadt TP, Birnbaum MJ (1989) Pretranslational suppression of an insulin-responsive glucose transporter in rats with diabetes mellitus. *Science* 245: 60–63.
41. Mozzanega B, Mioni R, Granzotto M, Chiarelli S, Xamin N, et al. (2004) Obesity reduces the expression of GLUT4 in the endometrium of normoinsulinemic women affected by the polycystic ovary syndrome. *Ann N Y Acad Sci* 1034: 364–374. doi: 10.1196/annals.1335.038.
42. Habegger KM, Hoffman NJ, Ridenour CM, Brozinick JT, Elmendorf JS (2012) AMPK enhances insulin-stimulated GLUT4 regulation via lowering membrane cholesterol. *Endocrinology* 153: 2130–2141. doi: 10.1210/en.2011-2099.
43. Seppala-Lindroos A, Vehkavaara S, Hakkinen AM, Goto T, Westerbacka J, et al. (2002) Fat accumulation in the liver is associated with defects in insulin suppression of glucose production and serum free fatty acids independent of obesity in normal men. *J Clin Endocrinol Metab* 87: 3023–3028.
44. Chitturi S, Farrell G, Frost L, Kriketos A, Lin R, et al. (2002) Serum leptin in NASH correlates with hepatic steatosis but not fibrosis: a manifestation of lipotoxicity? *Hepatology* 36: 403–409. doi: 10.1053/jhep.2002.34738.
45. Mason RJ, Pan T, Edeen KE, Nielsen LD, Zhang F, et al. (2003) Keratinocyte growth factor and the transcription factors C/EBP alpha, C/EBP delta, and SREBP-1c regulate fatty acid synthesis in alveolar type II cells. *J Clin Invest* 112: 244–255. doi: 10.1172/JCI16793.
46. Schwartz MW, Seeley RJ, Woods SC, Weigle DS, Campfield LA, et al. (1997) Leptin increases hypothalamic pro-opiomelanocortin mRNA expression in the rostral arcuate nucleus. *Diabetes* 46: 2119–2123.
47. Korer J, Savontaus E, Chua SC Jr, Leibel RL, Wardlaw SL (2001) Leptin regulation of *Agrp* and *Npy* mRNA in the rat hypothalamus. *J Neuroendocrinol* 13: 959–966. doi: 716 [pii].
48. Wilding JP (2002) Neuropeptides and appetite control. *Diabet Med* 19: 619–627. doi: 790 [pii].
49. Swart L, Jahng JW, Overton JM, Houpt TA (2002) Hypothalamic NPY, AGRP, and POMC mRNA responses to leptin and refeeding in mice. *Am J Physiol Regul Integr Comp Physiol* 283: R1020–1026. doi: 10.1152/ajpregu.00501.2001.
50. Havel PJ (1998) Leptin production and action: relevance to energy balance in humans. *Am J Clin Nutr* 67: 355–356.
51. Klempel MC, Kroeger CM, Bhutani S, Trepanowski JF, Varady KA (2012) Intermittent fasting combined with calorie restriction is effective for weight loss and cardio-protection in obese women. *Nutr J* 11: 98. doi: 10.1186/1475-2891-11-98.
52. Johnson JB, Laub DR, John S (2006) The effect on health of alternate day caloric restriction: eating less and more than needed on alternate days prolongs life. *Med Hypotheses* 67: 209–211. doi: 10.1016/j.mehy.2006.01.030.
